# Supplementary material
Source: publisher figshare collection journal article supplement (https://acs.figshare.com/ndownloader/files/4575025)
Supplement: Supplementary file 1 [file 4575025]

Supporting Material

Free-Radical-Induced Oxidative and Reductive Degradation of Fibrate  
Pharmaceuticals: Kinetic Studies and Degradation Mechanisms

Behnaz Razavi<sup>1</sup>, Weihua Song<sup>1,\*</sup>, William J. Cooper<sup>1</sup>, John Greaves<sup>2</sup>, Joonseon Jeong<sup>1</sup>

<sup>1</sup>Urban Water Research Center, Department of Civil and Environmental Engineering,

University of California, Irvine

Irvine, CA 92697-2175

[brazavi@uci.edu](mailto:brazavi@uci.edu)

[wsong@uci.edu](mailto:wsong@uci.edu)

[wcooper@uci.edu](mailto:wcooper@uci.edu)

[hahaha1@snu.ac.kr](mailto:hahaha1@snu.ac.kr)

<sup>2</sup>Department of Chemistry  
University of California, Irvine  
Irvine, CA 92697

[jgreaves@uci.edu](mailto:jgreaves@uci.edu)

Journal of Physical Chemistry A

November 22, 2008

**Reaction Efficiency.** Steady-state experiments were performed using  $^{137}\text{Cs}$  radiolysis to determine the efficiency of hydroxyl radical and hydrated electron degradation of the fibrate pharmaceuticals. Steady-state irradiation of these three compounds in aerated aqueous solution resulted in decreasing concentrations as the dose was increased. The results are shown below in Figure S1

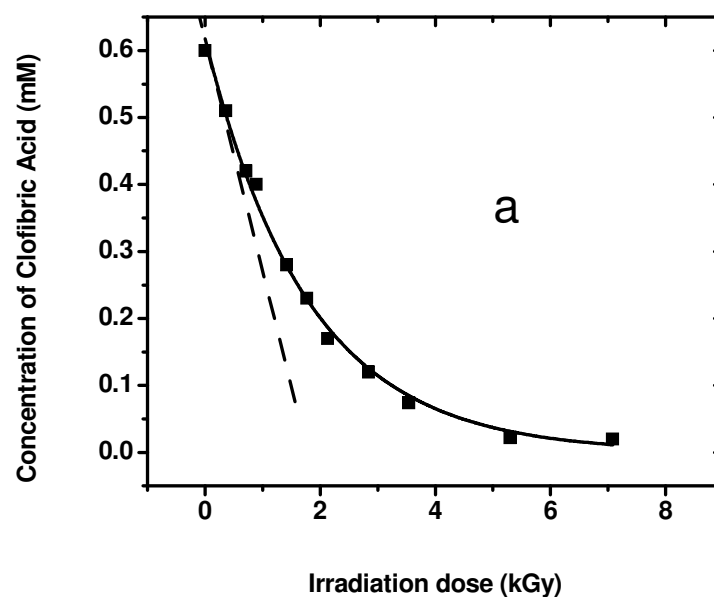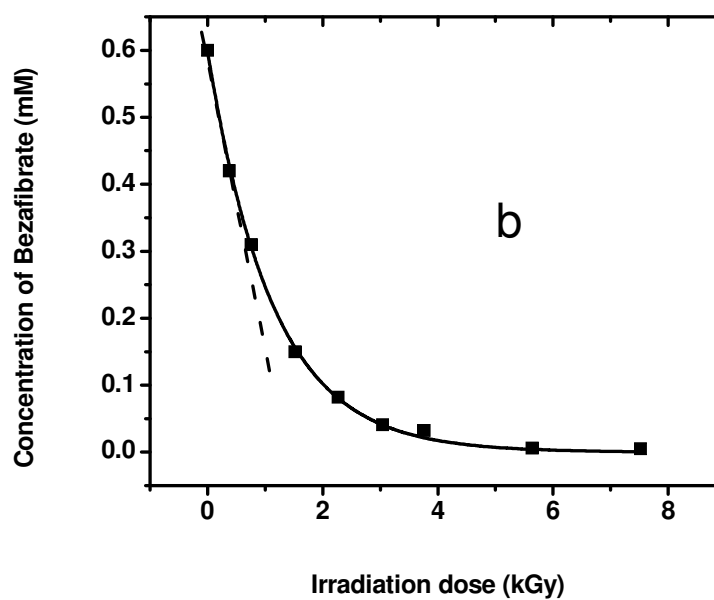

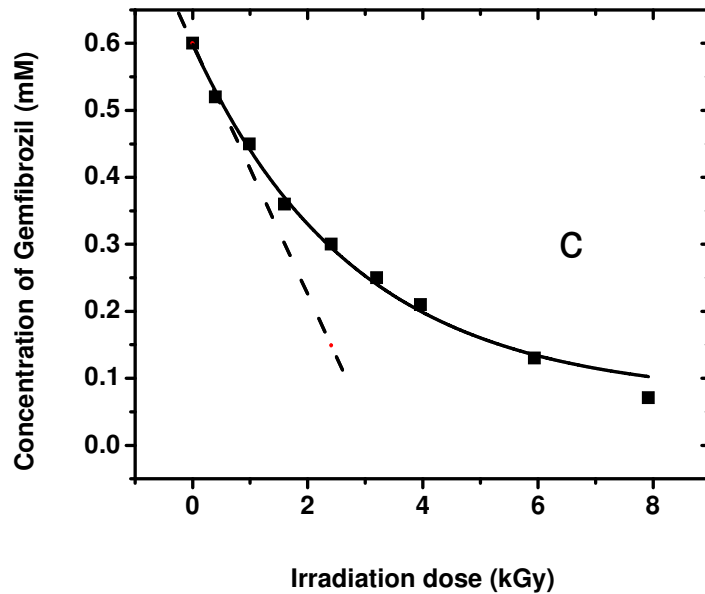

**Figure S1.** Measured loss of clofibric acid (a), bezafibrate (b) and gemfibrozil (c) in aerated aqueous solution using  $^{137}\text{Cs}$   $\gamma$ -irradiation. Curves correspond to fitted exponential loss, while dashed straight lines are the estimated initial slopes with values of  $m = -2.95 \times 10^{-4} \text{ M kGy}^{-1}$ ,  $-4.29 \times 10^{-4} \text{ M kGy}^{-1}$ ,  $-1.87 \times 10^{-4} \text{ M kGy}^{-1}$  for clofibric acid, bezafibrate and gemfibrozil respectively.
